# Supplementary material for: Low-Dose Bisphenol A Increases Bile Duct Proliferation in Juvenile Rats: A Possible Evidence for Risk of Liver Cancer in the Exposed Population?
Source: PubMed Central journal article supplement — Biomol Ther (Seoul). 2017 Aug 21;25(5):545–52. doi: 10.4062/biomolther.2017.148 (PMC5590799; doi:10.4062/biomolther.2017.148), 2017-08-21
Supplement: bt-25-545_suppl.pdf [file bt-25-545_suppl.pdf]

**Supplementary data: Table 1. Hematology**

| Sex                        | Males          |               |               |                 |                           |               | Females       |               |                 |                           |                            |                 |                 |                |                 |                           |                |                |                 |                 |                 |  |
|----------------------------|----------------|---------------|---------------|-----------------|---------------------------|---------------|---------------|---------------|-----------------|---------------------------|----------------------------|-----------------|-----------------|----------------|-----------------|---------------------------|----------------|----------------|-----------------|-----------------|-----------------|--|
|                            | 0              |               | 0.5           |                 | 5                         |               | 50            |               | 250             |                           | 0                          |                 | 0.5             |                | 5               |                           | 50             |                | 250             |                 |                 |  |
|                            | No. of animals |               | 10            |                 | 10                        |               | 10            |               | 10              |                           | 10                         |                 | 9               |                | 10              |                           | 10             |                | 10              |                 |                 |  |
| Dose level (mg/kg/day)     |                |               |               |                 |                           |               |               |               |                 |                           |                            |                 |                 |                |                 |                           |                |                |                 |                 |                 |  |
| RBC (x10 <sup>6</sup> /μL) | 9.00 ± 0.51    | 8.89 ± 0.68   | 9.14 ± 0.57   | 9.09 ± 0.34     | 9.29 ± 0.62               | 9.06 ± 0.77   | 8.89 ± 0.37   | 8.89 ± 0.47   | 8.99 ± 0.49     | 8.87 ± 0.34               | 16.8 ± 0.9                 | 16.4 ± 0.5      | 16.4 ± 0.8      | 16.5 ± 0.7     | 16.6 ± 0.8      | 51.2 ± 3.1                | 50.2 ± 1.6     | 49.8 ± 2.8     | 50.8 ± 2.2      | 50.5 ± 2.3      |                 |  |
| HGB (g/dL)                 | 16.3 ± 0.8     | 15.9 ± 0.8    | 16.1 ± 0.4    | 16.5 ± 0.6      | 17.0 ± 0.5*               | 16.8 ± 0.9    | 16.4 ± 0.5    | 16.4 ± 0.8    | 16.5 ± 0.7      | 16.6 ± 0.8                | 56.5 ± 1.6                 | 55.2 ± 1.9      | 54.8 ± 2.1      | 56.4 ± 1.3     | 56.9 ± 1.7      | 56.6 ± 2.4                | 56.5 ± 2.1     | 56.0 ± 1.4     | 56.5 ± 2.0      | 56.9 ± 1.8      |                 |  |
| HCT (%)                    | 50.9 ± 3.2     | 49.0 ± 2.8    | 50.0 ± 1.6    | 51.2 ± 1.5      | 52.8 ± 2.1                | 51.2 ± 3.1    | 50.2 ± 1.6    | 49.8 ± 2.8    | 50.8 ± 2.2      | 50.5 ± 2.3                | 18.1 ± 0.4                 | 17.8 ± 0.6      | 17.6 ± 0.8      | 18.1 ± 0.4     | 18.4 ± 0.9      | 18.6 ± 0.8                | 18.5 ± 0.6     | 18.4 ± 0.6     | 18.4 ± 0.6      | 18.8 ± 0.9      |                 |  |
| MCV (fL)                   | 56.5 ± 1.6     | 55.2 ± 1.9    | 54.8 ± 2.1    | 56.4 ± 1.3      | 56.9 ± 1.7                | 56.6 ± 2.4    | 56.5 ± 2.1    | 56.0 ± 1.4    | 56.5 ± 2.0      | 56.9 ± 1.8                | 32.0 ± 0.5                 | 32.4 ± 0.3      | 32.1 ± 0.6      | 32.2 ± 0.5     | 32.3 ± 0.6      | 32.9 ± 0.4                | 32.7 ± 0.4     | 33.0 ± 0.8     | 32.5 ± 0.3      | 32.9 ± 0.9      |                 |  |
| MCH (pg)                   | 18.1 ± 0.4     | 17.8 ± 0.6    | 17.6 ± 0.8    | 18.1 ± 0.4      | 18.4 ± 0.9                | 18.6 ± 0.8    | 18.5 ± 0.6    | 18.4 ± 0.9    | 18.4 ± 0.6      | 18.8 ± 0.9                | 986 ± 88.56                | 1054.1 ± 121.39 | 1051.1 ± 90.19  | 1054.7 ± 59.83 | 1016.2 ± 65.25  | 890.9 ± 171.59            | 922.8 ± 102.96 | 936.0 ± 127.65 | 1074.8 ± 205.20 | 922.8 ± 200.19  |                 |  |
| MCHC (g/dL)                | 32.0 ± 0.5     | 32.4 ± 0.3    | 32.1 ± 0.6    | 32.2 ± 0.5      | 32.3 ± 0.6                | 32.9 ± 0.4    | 32.7 ± 0.4    | 33.0 ± 0.8    | 32.5 ± 0.3      | 32.9 ± 0.9                | PLT (10 <sup>3</sup> /μL)  | 986 ± 88.56     | 1054.1 ± 121.39 | 1051.1 ± 90.19 | 1054.7 ± 59.83  | 890.9 ± 171.59            | 922.8 ± 102.96 | 936.0 ± 127.65 | 1074.8 ± 205.20 | 922.8 ± 200.19  |                 |  |
| WBC (x10 <sup>3</sup> /μL) | 10.16 ± 1.853  | 11.25 ± 2.124 | 12.22 ± 2.776 | 13.85 ± 3.271*  | 14.58 ± 2.971**           | 5.43 ± 1.866  | 7.99 ± 1.318  | 8.28 ± 2.113  | 9.82 ± 2.431**  | 12.29 ± 5.087**           | NEU (%)                    | 10.16 ± 1.853   | 11.25 ± 2.124   | 12.22 ± 2.776  | 13.85 ± 3.271*  | 5.43 ± 1.866              | 7.99 ± 1.318   | 8.28 ± 2.113   | 9.82 ± 2.431**  | 12.29 ± 5.087** |                 |  |
| NEU (%)                    | 16.9 ± 4.44    | 15.5 ± 3.91   | 13.7 ± 4.01   | 12.7 ± 3.41*    | 8.8 ± 2.48**              | 12.4 ± 3.84   | 12.4 ± 5.81   | 10.8 ± 3.22   | 10.1 ± 3.52     | 7.3 ± 3.18*               | LYM (%)                    | 76.3 ± 4.99     | 78.2 ± 4.07     | 79.1 ± 4.94    | 81 ± 4.19       | 85.0 ± 2.62**             | 81.3 ± 4.73    | 81.8 ± 6.06    | 82.6 ± 4.92     | 83.3 ± 5.29     | 86.5 ± 3.13     |  |
| LYM (%)                    | 76.3 ± 4.99    | 78.2 ± 4.07   | 79.1 ± 4.94   | 81 ± 4.19       | 85.0 ± 2.62**             | 2.6 ± 0.46    | 3.0 ± 0.79    | 3.7 ± 1.83    | 3.4 ± 1.32      | 3.0 ± 0.59                | MON (%)                    | 3.6 ± 1.25      | 3.3 ± 0.78      | 4 ± 0.89       | 3.7 ± 1.30      | 3.4 ± 0.68                | 2.6 ± 0.46     | 3.0 ± 0.79     | 3.7 ± 1.83      | 3.4 ± 1.32      | 3.0 ± 0.59      |  |
| MON (%)                    | 3.6 ± 1.25     | 3.3 ± 0.78    | 4 ± 0.89      | 3.7 ± 1.30      | 3.4 ± 0.68                | 1.4 ± 0.38    | 1.2 ± 0.52    | 0.8 ± 0.21**  | 0.9 ± 0.29**    | 0.8 ± 0.30**              | EOS (%)                    | 1.4 ± 0.38      | 1.2 ± 0.52      | 0.8 ± 0.21**   | 0.9 ± 0.29**    | 0.8 ± 0.30**              | 1.4 ± 0.51     | 1.0 ± 0.35     | 1.0 ± 0.39      | 1.0 ± 0.38      | 1.0 ± 0.24      |  |
| EOS (%)                    | 1.4 ± 0.38     | 1.2 ± 0.52    | 0.8 ± 0.21**  | 0.9 ± 0.29**    | 0.8 ± 0.30**              | 0.7 ± 0.29    | 0.4 ± 0.21    | 0.5 ± 0.15    | 0.5 ± 0.10      | 0.5 ± 0.09                | BAS (%)                    | 0.4 ± 0.11      | 0.4 ± 0.13      | 0.4 ± 0.07     | 0.4 ± 0.09      | 0.5 ± 0.09                | 0.7 ± 0.29     | 0.4 ± 0.21     | 0.5 ± 0.15      | 0.5 ± 0.10      | 0.5 ± 0.09      |  |
| BAS (%)                    | 0.4 ± 0.11     | 0.4 ± 0.13    | 0.4 ± 0.07    | 0.4 ± 0.09      | 0.5 ± 0.09                | 2.37 ± 0.312  | 2.53 ± 0.411  | 2.29 ± 0.268  | 2.51 ± 0.229    | 2.52 ± 0.275              | RET (%)                    | 2.37 ± 0.312    | 2.53 ± 0.411    | 2.29 ± 0.268   | 2.51 ± 0.229    | 2.52 ± 0.275              | 2.67 ± 0.471   | 2.48 ± 0.260   | 2.52 ± 0.383    | 2.64 ± 0.460    | 2.96 ± 0.515    |  |
| RET (%)                    | 2.37 ± 0.312   | 2.53 ± 0.411  | 2.29 ± 0.268  | 2.51 ± 0.229    | 2.52 ± 0.275              | 1.4 ± 0.44    | 1.4 ± 0.32    | 2.0 ± 0.68*   | 1.4 ± 0.45      | 1.6 ± 0.58                | LUC% (%)                   | 1.4 ± 0.44      | 1.4 ± 0.32      | 2.0 ± 0.68*    | 1.4 ± 0.45      | 1.6 ± 0.58                | 1.6 ± 1.05     | 1.3 ± 0.18     | 1.6 ± 0.47      | 1.8 ± 0.60      | 1.7 ± 0.48      |  |
| LUC% (%)                   | 1.4 ± 0.44     | 1.4 ± 0.32    | 2.0 ± 0.68*   | 1.4 ± 0.45      | 1.6 ± 0.58                | 1.78 ± 0.805  | 1.74 ± 0.620  | 1.68 ± 0.671  | 1.74 ± 0.577    | 1.29 ± 0.483              | NEU (x10 <sup>3</sup> /μL) | 1.78 ± 0.805    | 1.74 ± 0.620    | 1.68 ± 0.671   | 1.74 ± 0.577    | 1.29 ± 0.483              | 0.65 ± 0.215   | 1.01 ± 0.565   | 0.88 ± 0.309    | 0.94 ± 0.226    | 0.82 ± 0.292    |  |
| NEU (x10 <sup>3</sup> /μL) | 1.78 ± 0.805   | 1.74 ± 0.620  | 1.68 ± 0.671  | 1.74 ± 0.577    | 1.29 ± 0.483              | 7.67 ± 0.925  | 8.81 ± 1.810  | 9.67 ± 2.408  | 11.27 ± 2.946** | 12.37 ± 2.430**           | LYM (x10 <sup>3</sup> /μL) | 7.67 ± 0.925    | 8.81 ± 1.810    | 9.67 ± 2.408   | 11.27 ± 2.946** | 12.37 ± 2.430**           | 4.45 ± 1.709   | 6.52 ± 1.068   | 6.85 ± 1.822    | 8.26 ± 2.471**  | 10.71 ± 4.718** |  |
| LYM (x10 <sup>3</sup> /μL) | 7.67 ± 0.925   | 8.81 ± 1.810  | 9.67 ± 2.408  | 11.27 ± 2.946** | 12.37 ± 2.430**           | 0.37 ± 0.155  | 0.36 ± 0.077  | 0.49 ± 0.143  | 0.48 ± 0.123    | 0.49 ± 0.112              | MON (x10 <sup>3</sup> /μL) | 0.37 ± 0.155    | 0.36 ± 0.077    | 0.49 ± 0.143   | 0.48 ± 0.123    | 0.49 ± 0.112              | 0.14 ± 0.042   | 0.24 ± 0.075   | 0.30 ± 0.152**  | 0.32 ± 0.115**  | 0.36 ± 0.150**  |  |
| MON (x10 <sup>3</sup> /μL) | 0.37 ± 0.155   | 0.36 ± 0.077  | 0.49 ± 0.143  | 0.48 ± 0.123    | 0.49 ± 0.112              | 0.14 ± 0.045  | 0.13 ± 0.051  | 0.1 ± 0.022   | 0.12 ± 0.044    | 0.12 ± 0.060              | EOS (x10 <sup>3</sup> /μL) | 0.14 ± 0.045    | 0.13 ± 0.051    | 0.1 ± 0.022    | 0.12 ± 0.044    | 0.12 ± 0.060              | 0.07 ± 0.022   | 0.08 ± 0.025   | 0.08 ± 0.044    | 0.10 ± 0.038    | 0.12 ± 0.059*   |  |
| EOS (x10 <sup>3</sup> /μL) | 0.14 ± 0.045   | 0.13 ± 0.051  | 0.1 ± 0.022   | 0.12 ± 0.044    | 0.12 ± 0.060              | 0.04 ± 0.013  | 0.05 ± 0.020  | 0.05 ± 0.012  | 0.06 ± 0.012    | 0.08 ± 0.016 <sup>†</sup> | BAS (x10 <sup>3</sup> /μL) | 0.04 ± 0.013    | 0.05 ± 0.020    | 0.05 ± 0.012   | 0.06 ± 0.012    | 0.08 ± 0.016 <sup>†</sup> | 0.04 ± 0.009   | 0.04 ± 0.013   | 0.04 ± 0.013    | 0.04 ± 0.013    | 0.06 ± 0.030    |  |
| BAS (x10 <sup>3</sup> /μL) | 0.04 ± 0.013   | 0.05 ± 0.020  | 0.05 ± 0.012  | 0.06 ± 0.012    | 0.08 ± 0.016 <sup>†</sup> | 211.8 ± 21.91 | 224.1 ± 34.78 | 208.3 ± 17.49 | 227.8 ± 23.12   | 234.3 ± 29.10             | RET (x10 <sup>9</sup> /μL) | 211.8 ± 21.91   | 224.1 ± 34.78   | 208.3 ± 17.49  | 227.8 ± 23.12   | 234.3 ± 29.10             | 240.1 ± 34.96  | 220.4 ± 21.94  | 224.4 ± 39.79   | 238.3 ± 46.18   | 262.8 ± 47.92   |  |
| RET (x10 <sup>9</sup> /μL) | 211.8 ± 21.91  | 224.1 ± 34.78 | 208.3 ± 17.49 | 227.8 ± 23.12   | 234.3 ± 29.10             | 0.14 ± 0.069  | 0.15 ± 0.032  | 0.25 ± 0.098* | 0.19 ± 0.076    | 0.24 ± 0.114              | LUC (x10 <sup>3</sup> /μL) | 0.14 ± 0.069    | 0.15 ± 0.032    | 0.25 ± 0.098*  | 0.19 ± 0.076    | 0.24 ± 0.114              | 0.08 ± 0.052   | 0.11 ± 0.023   | 0.13 ± 0.050    | 0.17 ± 0.045**  | 0.21 ± 0.113**  |  |
| LUC (x10 <sup>3</sup> /μL) | 0.14 ± 0.069   | 0.15 ± 0.032  | 0.25 ± 0.098* | 0.19 ± 0.076    | 0.24 ± 0.114              | 14.9 ± 0.54   | 15.3 ± 0.61   | 15.3 ± 0.60   | 15.2 ± 0.64     | 14.9 ± 0.65               | PT (sec)                   | 14.9 ± 0.54     | 15.3 ± 0.61     | 15.3 ± 0.60    | 15.2 ± 0.64     | 14.9 ± 0.65               | 14.2 ± 0.33    | 14.4 ± 0.68    | 14.5 ± 0.60     | 14.3 ± 0.31     | 14.8 ± 0.53     |  |
| PT (sec)                   | 14.9 ± 0.54    | 15.3 ± 0.61   | 15.3 ± 0.60   | 15.2 ± 0.64     | 14.9 ± 0.65               | 18.5 ± 0.71   | 17.9 ± 0.69   | 17.5 ± 0.97   | 17.2 ± 0.92*    | 15.8 ± 1.41**             | APTT (sec)                 | 18.5 ± 0.71     | 17.9 ± 0.69     | 17.5 ± 0.97    | 17.2 ± 0.92*    | 15.8 ± 1.41**             | 17.2 ± 1.32    | 16.0 ± 2.34    | 14.5 ± 1.44**   | 12.6 ± 1.23**   | 12.3 ± 2.04**   |  |
| APTT (sec)                 | 18.5 ± 0.71    | 17.9 ± 0.69   | 17.5 ± 0.97   | 17.2 ± 0.92*    | 15.8 ± 1.41**             | 17.2 ± 1.32   | 16.0 ± 2.34   | 14.5 ± 1.44** | 12.6 ± 1.23**   | 12.3 ± 2.04**             |                            |                 |                 |                |                 |                           |                |                |                 |                 |                 |  |

Each values represent the mean ± standard deviation (SD) \*P < 0.05, \*\*P < 0.01

**Table 2. Clinical Chemistry**

| Sex                    | Males          |                 |                 |                 |                 |                |                 |                  |                 |                  | Females |    |     |    |    |    |    |    |     |  |
|------------------------|----------------|-----------------|-----------------|-----------------|-----------------|----------------|-----------------|------------------|-----------------|------------------|---------|----|-----|----|----|----|----|----|-----|--|
|                        | 0              |                 | 0.5             |                 | 5               |                | 50              |                  | 250             |                  | 0       |    | 0.5 |    | 5  |    | 50 |    | 250 |  |
|                        | 10             | 10              | 10              | 10              | 10              | 10             | 10              | 10               | 10              | 10               | 9       | 10 | 10  | 10 | 10 | 10 | 10 | 10 | 10  |  |
| Dose level (mg/kg/day) |                |                 |                 |                 |                 |                |                 |                  |                 |                  |         |    |     |    |    |    |    |    |     |  |
| No. of animals         |                |                 |                 |                 |                 |                |                 |                  |                 |                  |         |    |     |    |    |    |    |    |     |  |
| GLU (mg/dL)            | 152.2 ± 24.92  | 148.1 ± 27.70   | 138 ± 32.96     | 124.6 ± 14.32   | 135.7 ± 20.88   | 99.4 ± 29.75   | 125.2 ± 35.38   | 108.1 ± 27.61    | 142.3 ± 31.84*  | 129.0 ± 36.69    |         |    |     |    |    |    |    |    |     |  |
| BUN (mg/dL)            | 15.2 ± 1.65    | 15.7 ± 0.90     | 16.4 ± 0.97     | 14.3 ± 1.69     | 14 ± 1.21       | 16.3 ± 2.51    | 17.6 ± 1.57     | 19.3 ± 6.62      | 16.8 ± 2.79     | 17.2 ± 1.52      |         |    |     |    |    |    |    |    |     |  |
| CREA (mg/dL)           | 0.57 ± 0.037   | 0.53 ± 0.030*   | 0.52 ± 0.026**  | 0.50 ± 0.037**  | 0.48 ± 0.021**  | 0.58 ± 0.047   | 0.61 ± 0.066    | 0.59 ± 0.087     | 0.57 ± 0.048    | 0.62 ± 0.073     |         |    |     |    |    |    |    |    |     |  |
| TP (g/dL)              | 6.96 ± 0.189   | 6.71 ± 0.294    | 6.95 ± 0.431    | 7.17 ± 0.247    | 7.07 ± 0.233    | 7.54 ± 0.167   | 7.76 ± 0.314    | 7.57 ± 0.267     | 7.88 ± 0.333    | 7.61 ± 0.487     |         |    |     |    |    |    |    |    |     |  |
| ALB (g/dL)             | 4.49 ± 0.123   | 4.36 ± 0.156    | 4.46 ± 0.264    | 4.5 ± 0.153     | 4.42 ± 0.089    | 4.93 ± 0.137   | 5.03 ± 0.266    | 4.84 ± 0.189     | 5.00 ± 0.254    | 4.77 ± 0.347     |         |    |     |    |    |    |    |    |     |  |
| A/G (ratio)            | 1.82 ± 0.108   | 1.86 ± 0.089    | 1.79 ± 0.052    | 1.69 ± 0.065**  | 1.68 ± 0.104**  | 1.90 ± 0.119   | 1.85 ± 0.097    | 1.78 ± 0.098*    | 1.73 ± 0.125**  | 1.68 ± 0.081**   |         |    |     |    |    |    |    |    |     |  |
| AST (IU/L)             | 131.9 ± 20.23  | 119.7 ± 14.45   | 129.7 ± 12.63   | 120.9 ± 6.23    | 114.2 ± 19.63*  | 140.8 ± 19.52  | 128.7 ± 20.45   | 129.8 ± 27.01    | 119.8 ± 23.70   | 105.2 ± 10.30†   |         |    |     |    |    |    |    |    |     |  |
| ALT (IU/L)             | 31.8 ± 5.43    | 29.4 ± 4.20     | 28 ± 3.83       | 30.1 ± 3.02     | 31.6 ± 4.71     | 28.9 ± 8.04    | 34.4 ± 12.79    | 25.8 ± 4.69      | 22.4 ± 2.39     | 24.5 ± 2.44      |         |    |     |    |    |    |    |    |     |  |
| TBIL (mg/dL)           | 0.138 ± 0.0245 | 0.171 ± 0.0284* | 0.153 ± 0.0268  | 0.169 ± 0.0312* | 0.174 ± 0.0257* | 0.159 ± 0.0196 | 0.189 ± 0.0176  | 0.209 ± 0.0271** | 0.226 ± 0.0305* | 0.236 ± 0.0413*  |         |    |     |    |    |    |    |    |     |  |
| GGT (IU/L)             | 0.69 ± 0.192   | 0.73 ± 0.250    | 0.7 ± 0.228     | 0.53 ± 0.190    | 1.11+D ± 0.187  | 1.19 ± 0.405   | 1.38 ± 0.556    | 1.23 ± 0.397     | 1.06 ± 0.366    | 2.23 ± 1.082     |         |    |     |    |    |    |    |    |     |  |
| ALP (IU/L)             | 403.8 ± 70.89  | 400.4 ± 56.12   | 340.5 ± 78.05   | 359.8 ± 68.93   | 447.6 ± 61.65   | 257.6 ± 51.96  | 235.4 ± 88.44   | 238.8 ± 74.30    | 240.3 ± 75.71   | 351.9 ± 85.33*   |         |    |     |    |    |    |    |    |     |  |
| TCHO (mg/dL)           | 78.9 ± 17.21   | 80.1 ± 23.20    | 83.3 ± 16.79    | 72.9 ± 8.24     | 75.4 ± 10.70    | 85.1 ± 23.62   | 88.1 ± 15.37    | 78.7 ± 18.08     | 80.5 ± 12.71    | 90.5 ± 18.63     |         |    |     |    |    |    |    |    |     |  |
| TG (mg/dL)             | 29.3 ± 12.56   | 30.2 ± 12.56    | 56.3 ± 37.35    | 32 ± 19.04      | 34.4 ± 13.81    | 17.7 ± 8.55    | 22.0 ± 13.87    | 19.5 ± 6.42      | 24.7 ± 8.22     | 25.9 ± 7.36      |         |    |     |    |    |    |    |    |     |  |
| Ca (mg/dL)             | 11.19 ± 0.535  | 11.38 ± 0.270   | 11.84 ± 0.561** | 11.65 ± 0.461   | 11.86 ± 0.253** | 11.21 ± 0.405  | 11.66 ± 0.503   | 11.70 ± 0.444    | 12.21 ± 0.271** | 12.27 ± 0.602**  |         |    |     |    |    |    |    |    |     |  |
| IP (mg/dL)             | 9.51 ± 0.777   | 9.51 ± 0.494    | 10.37 ± 0.633*  | 10.11 ± 0.761   | 10.40 ± 0.459*  | 7.95 ± 0.643   | 8.48 ± 0.733    | 8.78 ± 0.786     | 8.87 ± 0.874*   | 9.89 ± 0.626**   |         |    |     |    |    |    |    |    |     |  |
| K (mmol/L)             | 7.37 ± 1.217   | 7.28 ± 0.989    | 6.86 ± 1.098    | 7.07 ± 0.700    | 7.25 ± 0.512    | 6.69 ± 1.242   | 6.68 ± 1.394    | 6.86 ± 0.860     | 6.50 ± 0.793    | 7.52 ± 0.880     |         |    |     |    |    |    |    |    |     |  |
| CK (IU/L)              | 702.2 ± 157.65 | 556.9 ± 107.60  | 684.2 ± 156.32  | 603 ± 83.09     | 595.6 ± 112.75  | 841.2 ± 121.73 | 609.9 ± 181.42* | 681.8 ± 251.80   | 675.3 ± 210.65  | 544.3 ± 108.90** |         |    |     |    |    |    |    |    |     |  |
| PL (mg/dL)             | 107.3 ± 18.04  | 108.1 ± 18.56   | 120.6 ± 25.07   | 106.4 ± 10.06   | 114 ± 11.94     | 149.0 ± 31.54  | 155.7 ± 24.54   | 140.6 ± 22.27    | 148.6 ± 17.42   | 159.6 ± 28.25    |         |    |     |    |    |    |    |    |     |  |
| Na (mmol/L)            | 147 ± 1.05     | 146.5 ± 1.43    | 147.9 ± 1.66    | 147.9 ± 0.99    | 147.6 ± 0.97    | 146.9 ± 1.54   | 146.4 ± 1.17    | 146.2 ± 1.48     | 148.1 ± 1.37    | 146.8 ± 1.87     |         |    |     |    |    |    |    |    |     |  |
| Cl (mmol/L)            | 102.4 ± 1.43   | 102.8 ± 1.14    | 102.2 ± 2.04    | 103.3 ± 1.57    | 102.5 ± 0.97    | 105.0 ± 1.41   | 103.9 ± 1.60    | 104.0 ± 1.76     | 103.6 ± 0.97    | 103.0 ± 1.41     |         |    |     |    |    |    |    |    |     |  |

Each values represent the mean ± standard deviation (SD). \* P < 0.05, \*\* P < 0.01

**Table 3. Sexual Maturation**

|                                         | 0             | 0.5            | 5              | 50             | 250                         |
|-----------------------------------------|---------------|----------------|----------------|----------------|-----------------------------|
| <b>Male</b>                             |               |                |                |                |                             |
| Preputial separation days (age)         | 42.6 ± 1.51   | 41.78 ± 1.2    | 41.6 ± 1.58    | 42 ± 1.32      | 42.8 ± 1.23                 |
| Body weight on preputial Separation (g) | 223.51 ± 10.2 | 219.46 ± 17.91 | 230.6 ± 10.88  | 226.81 ± 11.81 | 230.85 ± 11.53              |
| No. of animals                          | 10            | 9 <sup>a</sup> | 10             | 9 <sup>a</sup> | 10                          |
| <b>Female</b>                           |               |                |                |                |                             |
| Vaginal opening days (age)              | 32.2 ± 1.75   | 33 ± 2.16      | 33 ± 2.16      | 32.8 ± 1.48    | 30.4 ± 0.52 <sup>**</sup>   |
| Body weight on vaginal opening (g)      | 122.79 ± 9.26 | 126.2 ± 10.63  | 136.19 ± 16.99 | 125.04 ± 13.07 | 107.94 ± 5.89 <sup>**</sup> |
| No. of animals                          | 10            | 10             | 10             | 10             | 10                          |

Each value represents the mean ± standard deviation (SD). Note. <sup>a</sup>One male was not conducted, \* P < 0.05, \*\* P < 0.01

**Table 4. Absolute Organ Weight**

| Dose level<br>(mg/kg/day)          | Sex             |                |                 |                 |                  |                |                |                |                |                |
|------------------------------------|-----------------|----------------|-----------------|-----------------|------------------|----------------|----------------|----------------|----------------|----------------|
|                                    | Males           |                |                 |                 |                  | Females        |                |                |                |                |
|                                    | 0               | 0.5            | 5               | 50              | 250              | 0              | 0.5            | 5              | 50             | 250            |
| No. of animals                     | 10              | 10             | 10              | 10              | 10               | 9              | 10             | 10             | 10             | 10             |
| Brain (g)                          | 2.111 ± 0.0771  | 2.03 ± 0.1070  | 2.115 ± 0.1085  | 2.061 ± 0.0878  | 2.068 ± 0.0948   | 1.968 ± 0.0884 | 1.916 ± 0.0829 | 1.965 ± 0.1067 | 1.918 ± 0.1237 | 1.925 ± 0.0974 |
| Heart (g)                          | 1.535 ± 0.0746  | 1.581 ± 0.1362 | 1.665 ± 0.1691  | 1.593 ± 0.1179  | 1.551 ± 0.1149   | 0.97 ± 0.0821  | 0.998 ± 0.0963 | 0.996 ± 0.1329 | 0.966 ± 0.1061 | 1.017 ± 0.1082 |
| Kidneys (g)                        | 3.736 ± 0.4984  | 3.832 ± 0.4035 | 3.922 ± 0.2244  | 3.775 ± 0.3999  | 3.994 ± 0.3763   | 2.099 ± 0.2106 | 2.12 ± 0.2386  | 2.263 ± 0.2554 | 2.206 ± 0.2545 | 2.28 ± 0.2475  |
| Liver (g)                          | 15.551 ± 1.2632 | 16 ± 2.1637    | 16.635 ± 2.0775 | 14.634 ± 1.5160 | 14.632 ± 1.8167  | 8.725 ± 1.3748 | 8.389 ± 0.9823 | 8.708 ± 0.8852 | 8.306 ± 0.7173 | 9.233 ± 1.0952 |
| Mammary gland (g)                  | 3.884 ± 0.8036  | 3.541 ± 0.8268 | 4.477 ± 1.2666  | 2.915 ± 0.3961  | 2.374 ± 0.3649** | 2.635 ± 0.8280 | 2.697 ± 0.5768 | 2.923 ± 0.8223 | 2.522 ± 1.2123 | 2.13 ± 0.4712  |
| Lung (g)                           | 1.683 ± 0.1054  | 1.752 ± 0.1795 | 1.821 ± 0.0780  | 1.822 ± 0.1506  | 1.868 ± 0.1194*  | 1.302 ± 0.1434 | 1.452 ± 0.1721 | 1.338 ± 0.0994 | 1.352 ± 0.1001 | 1.4 ± 0.0907   |
| Thyroid and parathyroid glands (g) | 0.021 ± 0.0061  | 0.018 ± 0.0051 | 0.019 ± 0.0048  | 0.018 ± 0.0053  | 0.022 ± 0.0037   | 0.018 ± 0.0029 | 0.017 ± 0.0036 | 0.017 ± 0.0041 | 0.016 ± 0.0037 | 0.017 ± 0.0035 |
| Prostate (g)                       | 0.553 ± 0.1028  | 0.593 ± 0.1680 | 0.544 ± 0.1614  | 0.51 ± 0.0847   | 0.518 ± 0.0776   | -              | -              | -              | -              | -              |
| L-Ovary (g)                        | -               | -              | -               | -               | -                | 0.049 ± 0.0178 | 0.044 ± 0.0118 | 0.048 ± 0.0093 | 0.039 ± 0.0104 | 0.052 ± 0.0098 |
| R-Ovary (g)                        | -               | -              | -               | -               | -                | 0.048 ± 0.0080 | 0.044 ± 0.0103 | 0.051 ± 0.0076 | 0.045 ± 0.0094 | 0.052 ± 0.0103 |

Absolute organ weight in male and female rats. Each value represents the mean ± standard deviation (SD). \*P < 0.05, +P < 0.01

**Table 5. Relative Organ Weight**

| Sex                                | Males            |                  |                  |                   |                    |                  | Females          |                  |                  |                  |  |  |
|------------------------------------|------------------|------------------|------------------|-------------------|--------------------|------------------|------------------|------------------|------------------|------------------|--|--|
|                                    | 0                | 0.5              | 5                | 50                | 250                | 0                | 0.5              | 5                | 50               | 250              |  |  |
| Dose level (mg/kg/day)             | 0                | 10               | 10               | 10                | 10                 | 9                | 10               | 10               | 10               | 10               |  |  |
| No. of animals                     | 502.9 ± 39.52    | 513.5 ± 32.21    | 535.4 ± 35.28    | 489.5 ± 25.88     | 482.6 ± 35.85      | 291.4 ± 30.69    | 287.8 ± 22.31    | 297.2 ± 27.05    | 280.7 ± 18.46    | 293.9 ± 22.73    |  |  |
| Terminal body weight               | 0.4216 ± 0.02994 | 0.3961 ± 0.02150 | 0.3959 ± 0.02093 | 0.4219 ± 0.02472  | 0.4302 ± 0.03170   | 0.6803 ± 0.05694 | 0.6693 ± 0.05672 | 0.6651 ± 0.05856 | 0.6858 ± 0.06103 | 0.6577 ± 0.04690 |  |  |
| Brain (g)                          | 0.3061 ± 0.01591 | 0.3079 ± 0.02017 | 0.3132 ± 0.04683 | 0.3255 ± 0.01714  | 0.3216 ± 0.01296   | 0.3341 ± 0.02368 | 0.3467 ± 0.02036 | 0.3352 ± 0.03078 | 0.344 ± 0.02874  | 0.3462 ± 0.02910 |  |  |
| Heart (g)                          | 0.7409 ± 0.05685 | 0.7462 ± 0.06289 | 0.7343 ± 0.04941 | 0.7711 ± 0.07078  | 0.8275 ± 0.04722** | 0.7221 ± 0.04762 | 0.7359 ± 0.04437 | 0.7614 ± 0.04943 | 0.7851 ± 0.06244 | 0.776 ± 0.06096  |  |  |
| Kidneys (g)                        | 3.0941 ± 0.13416 | 3.1076 ± 0.27638 | 3.1046 ± 0.31496 | 2.9863 ± 0.22042  | 3.0245 ± 0.19442   | 2.9848 ± 0.23980 | 2.9106 ± 0.18904 | 2.9301 ± 0.13410 | 2.9585 ± 0.14680 | 3.1392 ± 0.23102 |  |  |
| Liver (g)                          | 0.7732 ± 0.15578 | 0.687 ± 0.14318  | 0.8332 ± 0.21871 | 0.5975 ± 0.08977  | 0.4922 ± 0.06880** | 0.9047 ± 0.29458 | 0.9373 ± 0.18312 | 0.9705 ± 0.20073 | 0.8886 ± 0.39156 | 0.7215 ± 0.13074 |  |  |
| Mammary gland (g)                  | 0.3358 ± 0.02254 | 0.341 ± 0.02436  | 0.341 ± 0.01951  | 0.3732 ± 0.03863* | 0.3884 ± 0.02948** | 0.4475 ± 0.02705 | 0.5065 ± 0.06508 | 0.4519 ± 0.03654 | 0.4826 ± 0.03269 | 0.4774 ± 0.02434 |  |  |
| Lung (g)                           | 0.0041 ± 0.00111 | 0.0036 ± 0.00103 | 0.0036 ± 0.00075 | 0.0037 ± 0.00109  | 0.0047 ± 0.00080   | 0.0061 ± 0.00060 | 0.006 ± 0.00167  | 0.0056 ± 0.00136 | 0.0055 ± 0.00116 | 0.0058 ± 0.00111 |  |  |
| Thyroid and parathyroid glands (g) | 0.1101 ± 0.01903 | 0.1162 ± 0.03446 | 0.1014 ± 0.02717 | 0.1041 ± 0.01457  | 0.1083 ± 0.02081   | -                | -                | -                | -                | -                |  |  |
| Prostate (g)                       | -                | -                | -                | -                 | -                  | 0.017 ± 0.00616  | 0.015 ± 0.00347  | 0.0164 ± 0.00375 | 0.0138 ± 0.00398 | 0.0177 ± 0.00348 |  |  |
| L-Ovary (g)                        | -                | -                | -                | -                 | -                  | 0.0167 ± 0.00388 | 0.0151 ± 0.00285 | 0.017 ± 0.00232  | 0.0161 ± 0.00407 | 0.0177 ± 0.00286 |  |  |
| R-Ovary (g)                        | -                | -                | -                | -                 | -                  | -                | -                | -                | -                | -                |  |  |

Relative organ weight to terminal body weight in male and female rats. Each values represent the mean ± standard deviation (SD), \*P < 0.05, +P < 0.01
